# Supplementary material
Source: PubMed Central journal article supplement (PMC6638373)

Disease scale

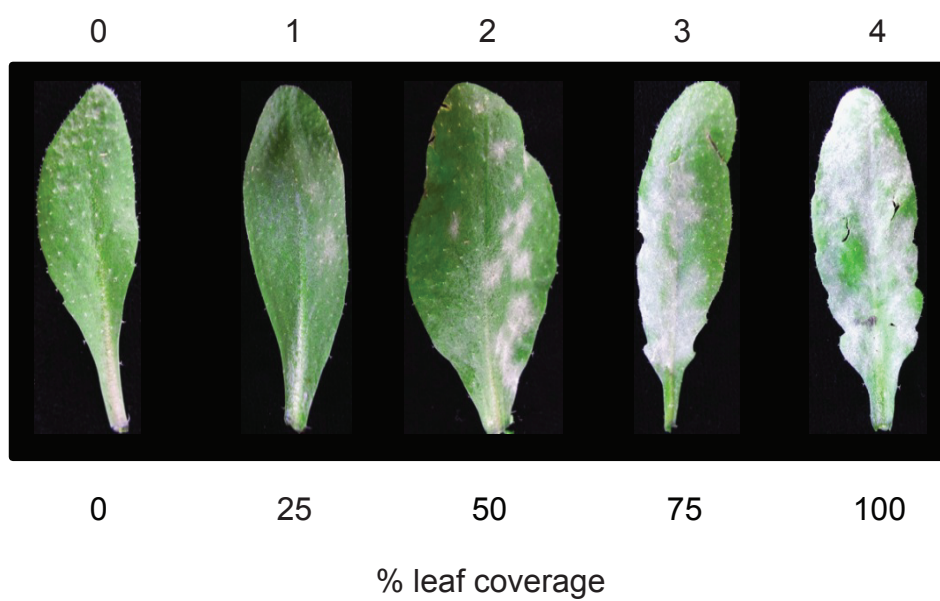

Supplement: MPP-16-572-s001.pdf [file MPP-16-572-s001.pdf]

Figure S2

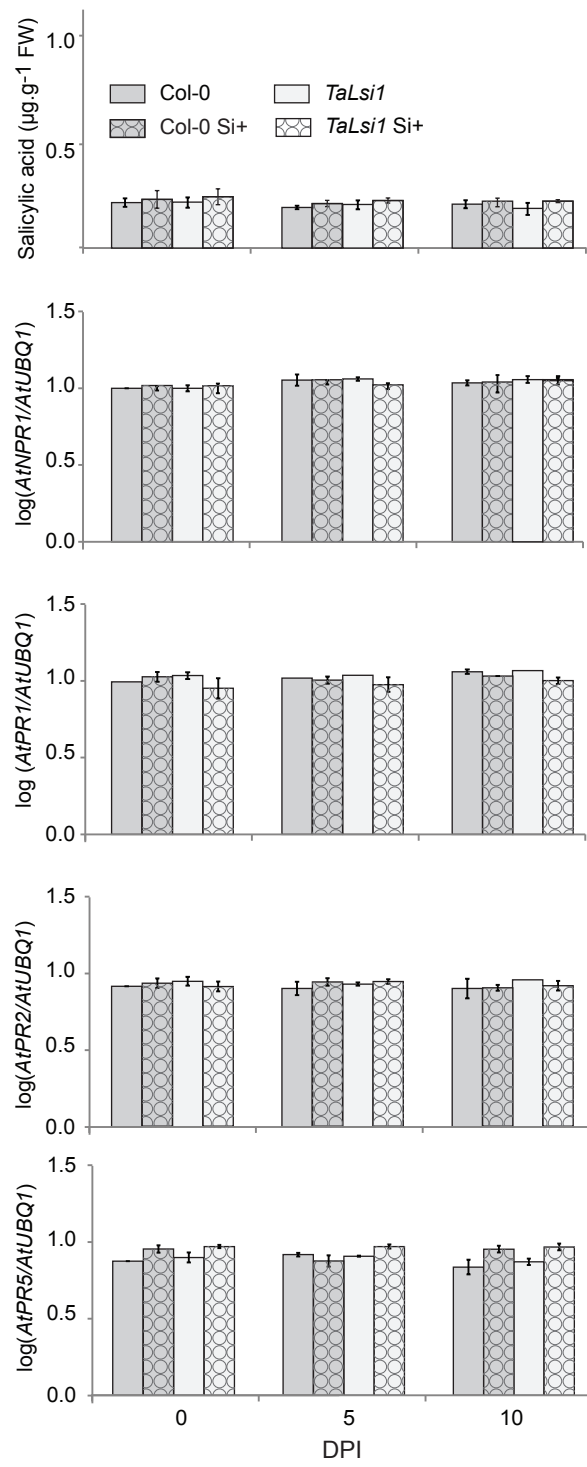

Supplement: MPP-16-572-s002.pdf [file MPP-16-572-s002.pdf]
